# Supplementary material for: Machine Learning for Predicting Risk of Drug-Induced Autoimmune Diseases by Structural Alerts and Daily Dose
Source: MDPI journal article supplement (doi:10.3390/ijerph18137139), 2021-07-03
Supplement: s1 [file s1]

Supplemental Table S1. Text mining of AD-related MedDRA terms in the Drug Label database.

| AD-related MedDRA terms                | Number of associated drugs |
|----------------------------------------|----------------------------|
| Thrombocytopenia                       | 469                        |
| Hemolytic anemia                       | 166                        |
| Vasculitis                             | 133                        |
| Systemic lupus erythematosus           | 105                        |
| Interstitial lung disease              | 83                         |
| Myopathy                               | 80                         |
| Polymyositis                           | 27                         |
| Pemphigus                              | 21                         |
| Scleroderma                            | 21                         |
| Lupus-like syndrome                    | 19                         |
| Glomerulonephritis                     | 15                         |
| Henoch-Schonlein purpura               | 15                         |
| Thyroiditis                            | 15                         |
| Pemphigoid                             | 12                         |
| Systemic scleroderma                   | 8                          |
| Autoimmune hemolytic anemia            | 6                          |
| Immune-mediated necrotizing myopathy   | 6                          |
| Dermatomyositis                        | 5                          |
| Autoimmune hepatitis                   | 3                          |
| Pulmonary granuloma                    | 2                          |
| Sjogren's syndrome                     | 2                          |
| Antiphospholipid syndrome              | 1                          |
| Autoimmune thyroiditis                 | 1                          |
| Linear IgA disease                     | 1                          |
| Glomerulonephritis rapidly progressive | 0                          |
| Granulomatous pneumonitis              | 0                          |

Supplemental Table S2. Evidence of drug-induced autoimmune disorders for the investigated drugs.

| Drug names     | Reference (PMID)              | Evidence level            |
|----------------|-------------------------------|---------------------------|
| minocycline    | Definite [10720762, 21327704] | Defined by seminal review |
| hydralazine    | Definite [10720762]           | Defined by seminal review |
| procainamide   | Definite [10720762]           | Defined by seminal review |
| quinidine      | Definite [10720762]           | Defined by seminal review |
| methyl dopa    | Definite [21327704, 21327704] | Defined by seminal review |
| nitrofurantoin | Definite [21327704]           | Defined by seminal review |
| acetaminophen  | Possible [10720762]           | Defined by seminal review |
| allopurinol    | Possible [10720762]           | Defined by seminal review |
| captopril      | Possible [10720762]           | Defined by seminal review |

|                  |                                                                      |                                                         |
|------------------|----------------------------------------------------------------------|---------------------------------------------------------|
| carbamazepine    | Possible [10720762]                                                  | Defined by seminal review                               |
| clonidine        | Possible [10720762]                                                  | Defined by seminal review                               |
| danazol          | Possible [10720762]                                                  | Defined by seminal review                               |
| disopyramide     | Possible [10720762]                                                  | Defined by seminal review                               |
| erythromycin     | Possible [10720762]                                                  | Defined by seminal review                               |
| ethosuximide     | Possible [10720762]                                                  | Defined by seminal review                               |
| griseofulvin     | Possible [10720762]                                                  | Defined by seminal review                               |
| labetalol        | Possible [10720762]                                                  | Defined by seminal review                               |
| lovastatin       | Possible [10720762]                                                  | Defined by seminal review                               |
| metoprolol       | Possible [10720762]                                                  | Defined by seminal review                               |
| pindolol         | Possible [10720762]                                                  | Defined by seminal review                               |
| primidone        | Possible [10720762]                                                  | Defined by seminal review                               |
| promethazine     | Possible [10720762]                                                  | Defined by seminal review                               |
| spironolactone   | Possible [10720762]                                                  | Defined by seminal review                               |
| streptomycin     | Possible [10720762]                                                  | Defined by seminal review                               |
| sulindac         | Possible [10720762]                                                  | Defined by seminal review                               |
| tolmetin         | Possible [10720762]                                                  | Defined by seminal review                               |
| isoniazid        | Probable [10720762, 21327704]                                        | Defined by seminal review                               |
| chlorpromazine   | Probable [10720762]                                                  | Defined by seminal review                               |
| atorvastatin     | Probable [21327704]                                                  | Defined by seminal review                               |
| diclofenac       | Probable [21327704]                                                  | Defined by seminal review                               |
| propylthiouracil | Probable [21327704]                                                  | Defined by seminal review                               |
| amiodarone       | Possible [3591459; 20525904; 28398380; 10684321]                     | Reported by multiple institutes and different countries |
| amoxicillin      | Possible [27252926; 25224696]                                        | Reported by multiple institutes and different countries |
| cefuroxime       | Probable [30977941; 23329991; 9015473]                               | Reported by multiple institutes and different countries |
| clobazam         | Possible [7743738; 26170788; 25690725]                               | Reported by multiple institutes and different countries |
| clozapine        | Probable [30948402; 28064233; 16670363; 15206677; 27580496; 7870651] | Reported by multiple institutes and different countries |
| deferoxamine     | Possible [1415353; 4050784; 2322425]                                 | Reported by multiple institutes and different countries |
| disulfiram       | Possible [9833921; 24247861]                                         | Reported by multiple institutes and different countries |
| enalapril        | Possible [1973510; 29282395; 26528346]                               | Reported by multiple institutes and different countries |
| fluvastatin      | Possible [9672281; 16446645; 21503830; 16940892; 17403199]           | Reported by multiple institutes and different countries |
| lisinopril       | Possible [30155951; 14754654; 8394798; 11780682]                     | Reported by multiple institutes and different countries |
| mesalazine       | Possible [1515833; 9385697; 10483021]                                | Reported by multiple institutes and different countries |
| pravastatin      | Possible [17404733; 16154665; 28831316; 1640970]                     | Reported by multiple institutes and different countries |
| quinine          | Possible [2297210; 8323089; 9867731; 25414441]                       | Reported by multiple institutes and different countries |
| simvastatin      | Possible [9743064; 15118389; 10628262; 18853127; 22700482]           | Reported by multiple institutes and different countries |
| sulfamethoxazole | Possible [28596226; 29121838; 27357280; 29469749]                    | Reported by multiple institutes and different countries |
| sulfasalazine    | Possible [27478675; 2894766; 7788172; 27778097]                      | Reported by multiple institutes and different countries |
| ticlopidine      | Possible [12390069; 20376687; 16961527; 17039105]                    | Reported by multiple institutes and different countries |

|               |                                         |                                                         |
|---------------|-----------------------------------------|---------------------------------------------------------|
| trimethoprim  | Possible [28596226; 29469749; 31763587] | Reported by multiple institutes and different countries |
| valproic acid | Possible [2111770; 8112240; 15717181]   | Reported by multiple institutes and different countries |

Supplemental Table S3. Hyperparameters tuned for the machine learning-based predictive model.

| Hyperparameters tuned      | Values  |
|----------------------------|---------|
| depth                      | 3       |
| iterations                 | 1000    |
| l2_leaf_reg                | 0.001   |
| leaf_estimation_iterations | 10      |
| loss_function              | Logloss |
| learning_rate              | 0.03    |
