# Supplementary material for: Machine Learning for Predicting Risk of Drug-Induced Autoimmune Diseases by Structural Alerts and Daily Dose
Source: Int J Environ Res Public Health. 2021 Jul 3;18(13):7139. doi: 10.3390/ijerph18137139 (PMC8296890; doi:10.3390/ijerph18137139)
Supplement: Supplementary file 1 [file ijerph-18-07139-s001.zip]

Archive with 7 entries (7 files):
- Supplemental Figure S1.jpg
- Supplemental Figure S2.jpg
- Supplemental Figure S3.jpg
- Supplemental Figure S4.tif
- Supplemental Figure S5.jpg
- Supplemental Figure S6.jpg
- Supplemental Tables.pdf
